# Supplementary material for: S100A8/A9 is not essential for the development of inflammation and joint pathology in interleukin-1 receptor antagonist knockout mice
Source: PubMed Central journal article supplement (PMC8375068; doi:10.1186/s13075-021-02602-y), 2021-08-19
Supplement: 13075_2021_2602_MOESM1_ESM.pdf [file 13075_2021_2602_MOESM1_ESM.pdf]

## Additional file 1

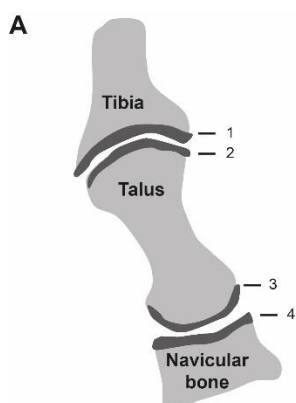

### Cartilage erosion

|                  |                                                                                  |
|------------------|----------------------------------------------------------------------------------|
| <b>SCORE 0</b>   | no erosion, no fibrillation, cartilage surface completely smooth                 |
| <b>SCORE 0.5</b> | fibrillation / irregular surface                                                 |
| <b>SCORE 1</b>   | mild erosion of the non-calcified layer (25% of depth of non-calcified layer)    |
| <b>SCORE 1,5</b> | severe erosion of non-calcified layer (50% of depth of non-calcified layer)      |
| <b>SCORE 2</b>   | erosion up until the tidemark                                                    |
| <b>SCORE 2.5</b> | erosion beyond the tidemark, part of the calcified cartilage layer still present |
| <b>SCORE 3</b>   | complete erosion of calcified layer                                              |

### PG depletion

|                |                                                                                                                                                                                                                                                   |
|----------------|---------------------------------------------------------------------------------------------------------------------------------------------------------------------------------------------------------------------------------------------------|
| <b>SCORE 0</b> | complete red staining of the superficial cartilage zone, equally stained as the deeper zone beyond the tidemark                                                                                                                                   |
| <b>SCORE 1</b> | mild loss of red staining in the superficial cartilage zone, but still predominantly red                                                                                                                                                          |
| <b>SCORE 2</b> | moderate loss of red staining in the superficial cartilage zone, with the blue counterstaining starting to predominate throughout the remaining gloom of redness                                                                                  |
| <b>SCORE 3</b> | complete loss of red staining of the superficial cartilage zone, with only blue counterstaining remaining or absence of proteoglycans due to complete erosion of the non-calcified layer or complete erosion of non-calcified and calcified layer |

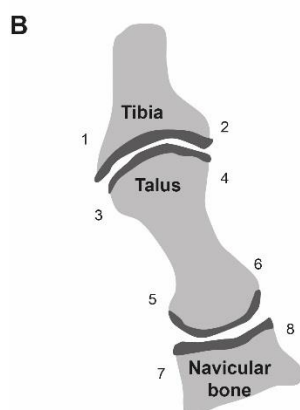

### Bone erosion

|                |                                                                                                    |
|----------------|----------------------------------------------------------------------------------------------------|
| <b>SCORE 0</b> | complete intact bone lining, no erosion                                                            |
| <b>SCORE 1</b> | superficial erosion                                                                                |
| <b>SCORE 2</b> | deeper erosion, not yet extending to the bone marrow                                               |
| <b>SCORE 3</b> | complete erosion of the bone structure, connecting the synovial cavity with the bone marrow cavity |

### **Scoring system for quantification of cartilage erosion, cartilage proteoglycan depletion and bone erosion.**

Cartilage erosion was evaluated using an arbitrary score ranging from 0 (no erosion) to 3 (complete erosion of the calcified cartilage layer) in four locations (1- tibia, 2-upper talus, 3-bottom talus, 4- upper navicular bone). Proteoglycan depletion in the articular cartilage was evaluated in the same four locations as cartilage erosion and scored on a scale from 0 (no PG depletion) to 3 (complete PG depletion). In case of a complete erosion of the non-calcified layer or complete erosion of non-calcified and calcified layer, PG depletion was scored as 3, since proteoglycans are completely absent under these conditions. The score of the four locations was averaged (**A**). Bone erosion was evaluated with an arbitrary score ranging from 0 (no erosion) to 3 (connection between joint cavity and bone marrow or more extensive bone destruction) in eight locations and the score of the eight locations was averaged (**B**).
