# Supplementary material for: S100A8/A9 is not essential for the development of inflammation and joint pathology in interleukin-1 receptor antagonist knockout mice
Source: Springer Nature journal article supplement (doi:10.1186/s13075-021-02602-y), 2021-08-19
Supplement: MOESM3 [file 13075_2021_2602_MOESM3_ESM.pdf]

Additional File 3

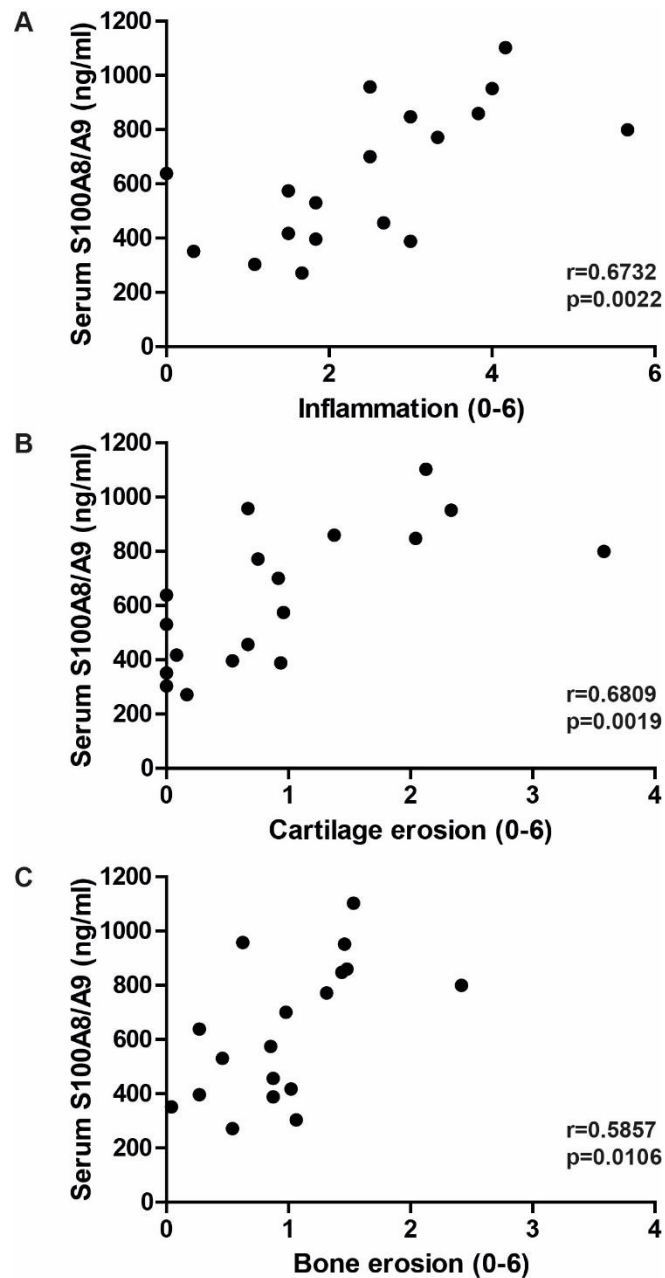

**Serum S100A8/A9 levels correlate with inflammation, cartilage and bone erosion in the ankle joints.**

Serum S100A8/A9 concentrations were determined by an in house developed sandwich ELISA as described previously (Vogl T *at al.* Nat Commun. 2014;5:4593, DOI: 10.1038/ncomms5593). Serum S100A8/A9 levels positively and significantly correlated with the severity of inflammation (A), cartilage erosion (B) and bone erosion (C) in the ankle joints of 12 weeks-old *Il1rn*<sup>-/-</sup> mice.  $r$  = Spearman's rank correlation coefficient.
