# Supplementary material for: S100A8/A9 is not essential for the development of inflammation and joint pathology in interleukin-1 receptor antagonist knockout mice
Source: Springer Nature journal article supplement (doi:10.1186/s13075-021-02602-y), 2021-08-19
Supplement: MOESM5 [file 13075_2021_2602_MOESM5_ESM.pdf]

## Additional File 5

### A S100A9

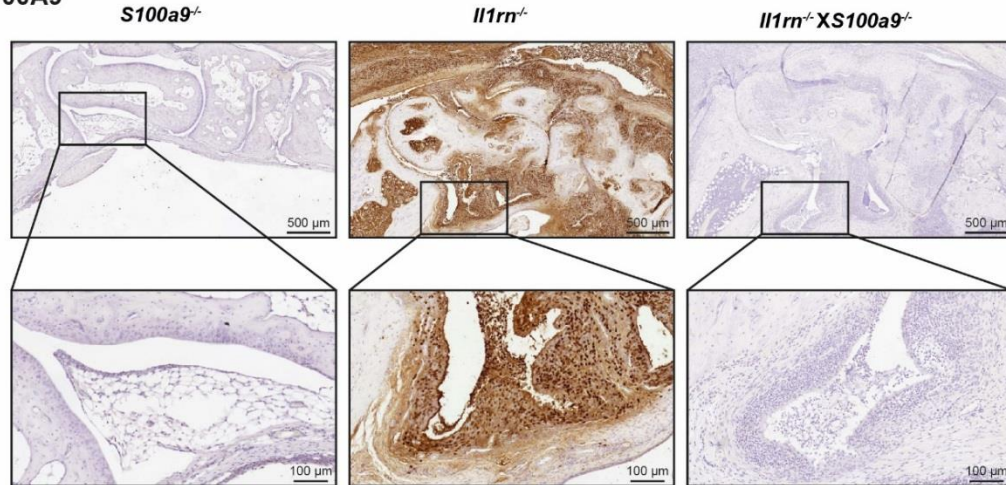

### B S100A8

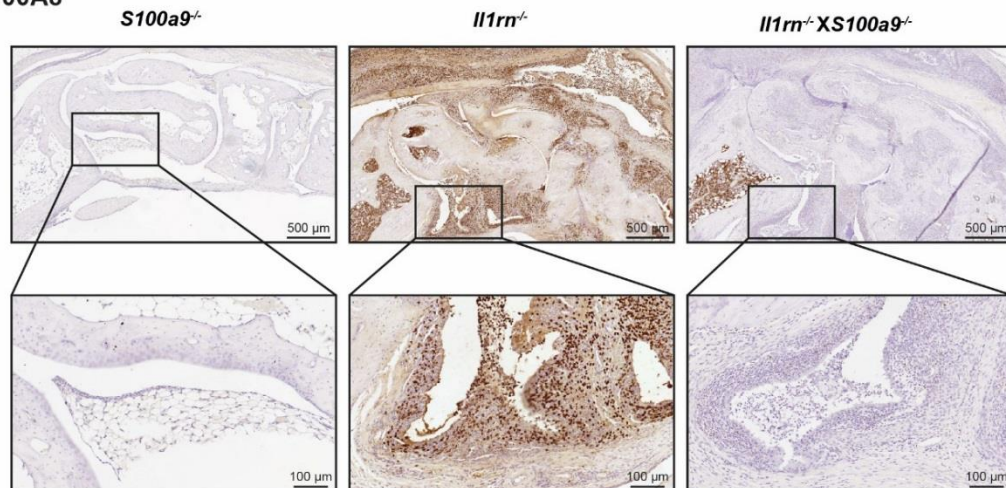

### ***S100a9*<sup>-/-</sup>*XS100a9*<sup>-/-</sup> do not show rescued expression of S100A8 in inflammatory cells within the arthritic joints.**

The expression of S100A8 and A9 in the ankle joint sections of 20-week-old *S100a9*<sup>-/-</sup>, *Il1rn*<sup>-/-</sup> and *Il1rn*<sup>-/-</sup>*XS100a9*<sup>-/-</sup> mice was determined with immunohistochemistry. Hereto, sections were digested with proteinase-free chondroitinase ABC (0.25 units/ml in 0.1 M Tris-HCl, pH 8.0; Sigma-Aldrich) for antigen retrieval followed by overnight incubation with rabbit anti-S100A8 or anti-S100A9 (*own facilities*). Sections were then incubated with biotinylated goat anti-rabbit IgG (Dako) as a secondary antibody followed by incubation with avidin-streptavidin-peroxidase (Elite-kit, Vector). Antibody binding was visualized using 3,3'-diaminobenzidine (DAB; Powervision DAB, Immunologic) and sections were counterstained with hematoxylin. Representative photomicrographs of S100A9 (**A**) and S100A8 (**B**) immunohistochemical staining are shown. S100A9 positive cells were absent in bone marrow and in synovium of *S100a9*<sup>-/-</sup> and of *Il1rn*<sup>-/-</sup>*XS100a9*<sup>-/-</sup> mice, whereas numerous S100A9 positive cells were visible in bone marrow (BM) and inflamed ankles of *Il1rn*<sup>-/-</sup> mice. High numbers of S100A8 positive cells were present in the ankle joints of *Il1rn*<sup>-/-</sup> mice. Note that expression of S100A8 protein is visible in BM of *Il1rn*<sup>-/-</sup>*XS100a9*<sup>-/-</sup> mice but not in the inflamed synovium suggesting that S100A8 expression is not rescued in the periphery under circumstances of high IL-1 signaling.
